# Supplementary material for: Glycolysis drives STING signaling to facilitate dendritic cell antitumor function
Source: JCI journal article supplement (doi:10.1172/jci166031), 2023-02-23
Supplement: sd1 [file 1]

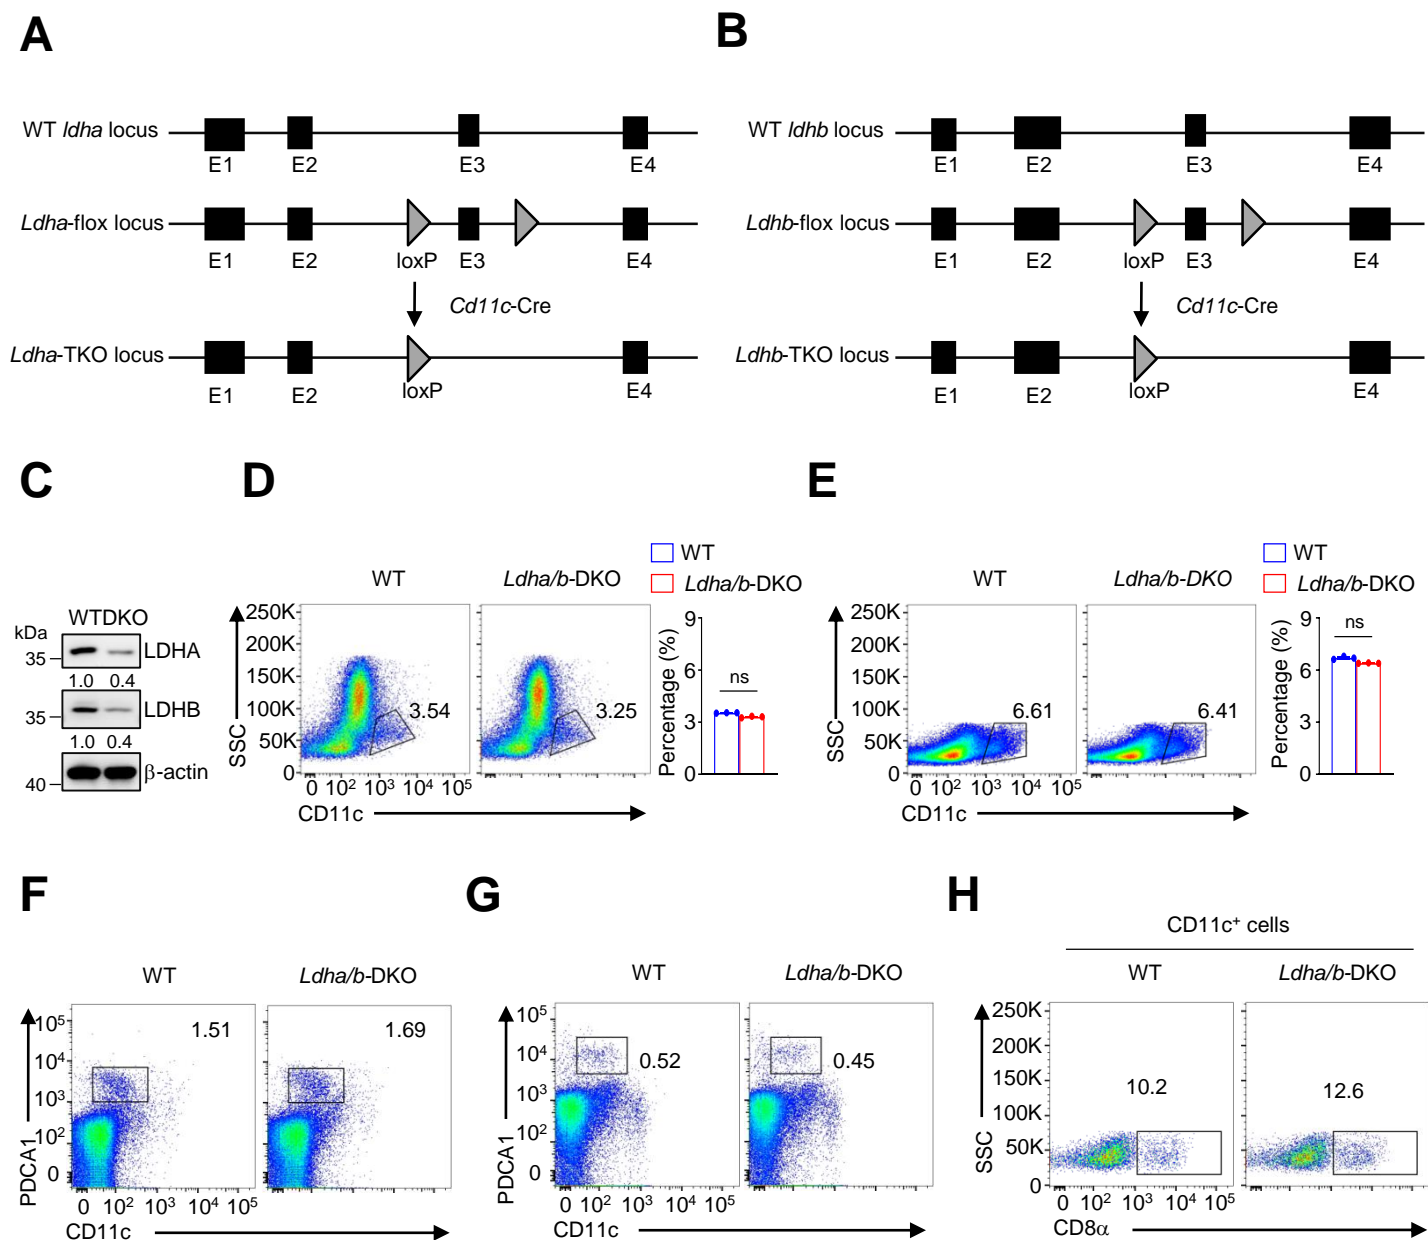

**Supplementary Figure 1. LDHA and LDHB are not required for DC development. (A and B)** Generation of *Ldha*-flox (A) and *Ldhb*-flox (B) mice. (C) Immunoblot analysis of indicated proteins in whole-cell lysates of WT and DKO BMDCs. *Ldha*<sup>f/f</sup>*Ldhb*<sup>f/f</sup> mice were crossed with *Cd11c*-Cre mice to obtain *Ldha*<sup>f/f</sup>*Ldhb*<sup>f/f</sup> (designated wild-type (WT)) and *Ldha*<sup>f/f</sup>*Ldhb*<sup>f/f</sup> *Cd11c*-Cre (designated double knockout (DKO)) mice. (D and E) Flow cytometry analysis of the percentage of CD11c<sup>+</sup> DCs in the bone marrow (D) or spleen (E). (F and G) Flow cytometry analysis of the percentage of plasmacytoid DC (CD11c<sup>+</sup>PDCA1<sup>+</sup>) in the bone marrow (F) or spleen (G). (H) Flow cytometry analysis of the percentage of CD8 $\alpha$ <sup>+</sup> DC (CD11c<sup>+</sup> CD8 $\alpha$ <sup>+</sup>) in the spleen. Data are representative of three independent experiments. Normalized expression of indicated proteins to  $\beta$ -actin are displayed. Data are presented as mean  $\pm$  SEM. Statistical analysis was performed using two-tailed Student's t test: ns, not statistically significant.

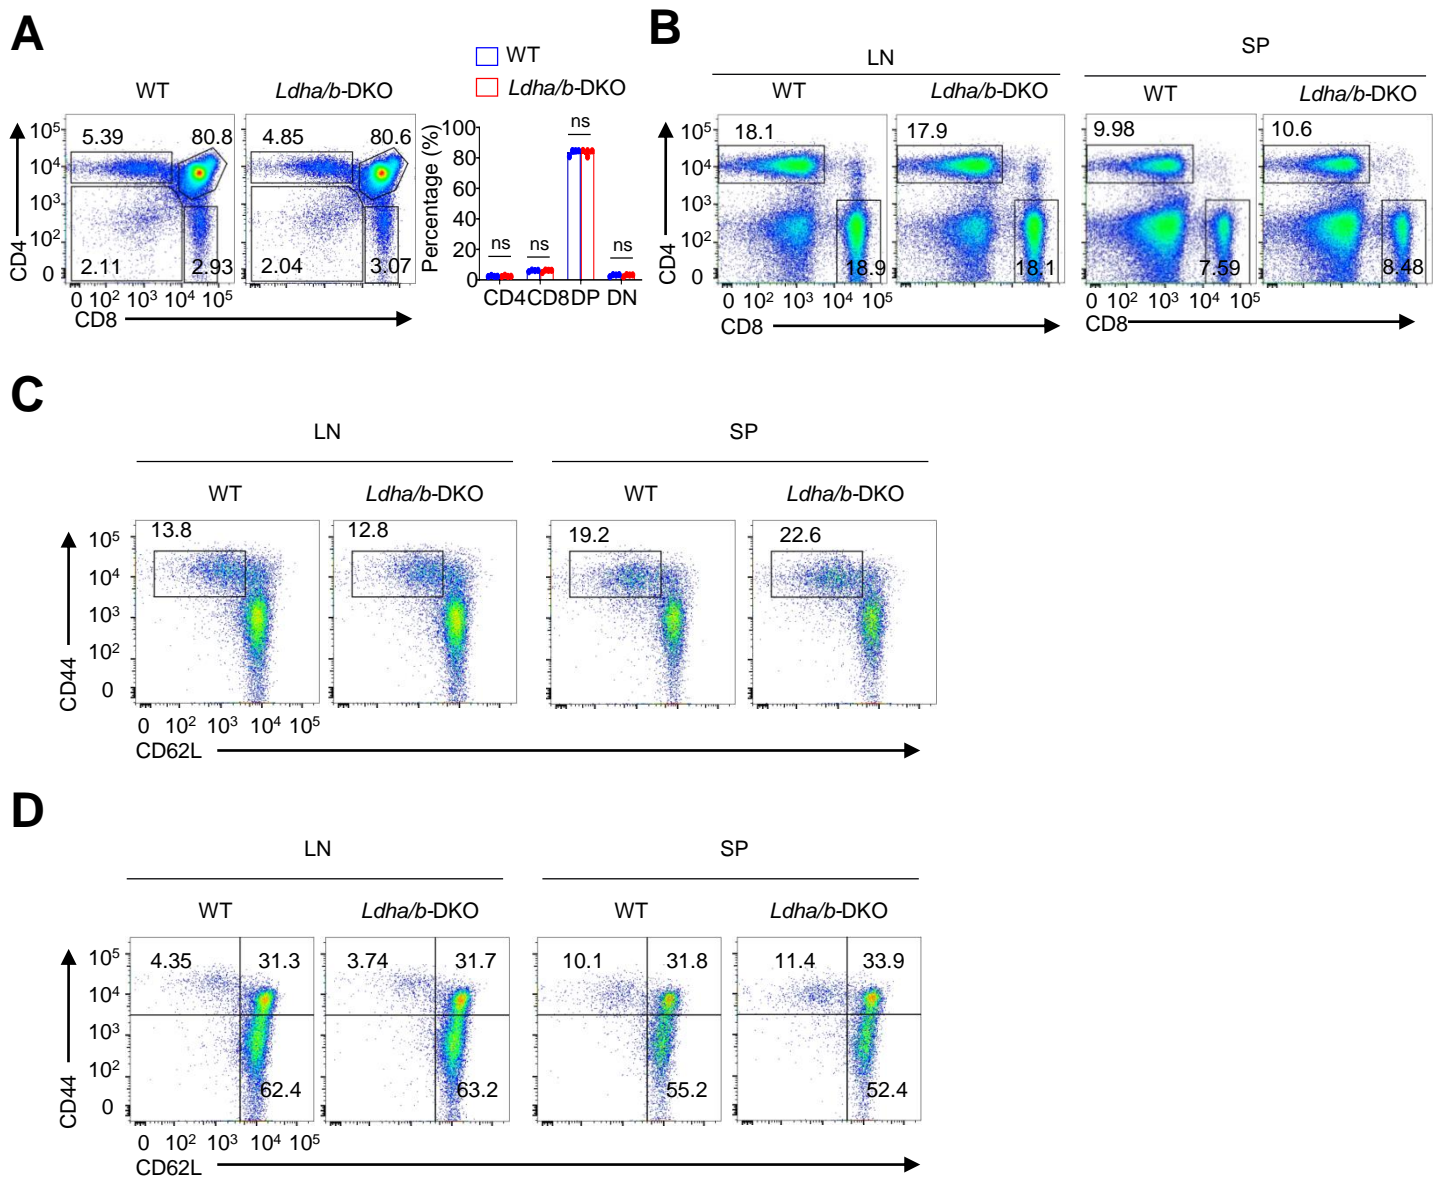

**Supplementary Figure 2. LDHA and LDHB are not required for T cell development.** Sex-matched 6-week-old WT and *Ldha/b-DKO* mice were sacrificed for flow cytometry analysis. **(A)** Flow cytometry analysis of the percentage of CD4 (CD4<sup>+</sup> CD8<sup>-</sup>), CD8 (CD4<sup>-</sup> CD8<sup>+</sup>), DP (CD4<sup>+</sup> CD8<sup>+</sup>) and DN (CD4<sup>-</sup> CD8<sup>-</sup>) T cells in the thymus. **(B)** Flow cytometry analysis of the percentage of CD4<sup>+</sup> and CD8<sup>+</sup> T cells in the lymph node (LN) and spleen (SP). **(C)** Flow cytometry analysis of CD44 and CD62L in CD4<sup>+</sup> T cells from lymph node (LN) and spleen (SP). **(D)** Flow cytometry analysis of CD44 and CD62L in CD8<sup>+</sup> T cells from lymph node (LN) and spleen (SP). Data are representative of three independent experiments. Data are presented as mean  $\pm$  SEM. Statistical analysis was performed using two-tailed Student's t test: ns, not statistically significant.

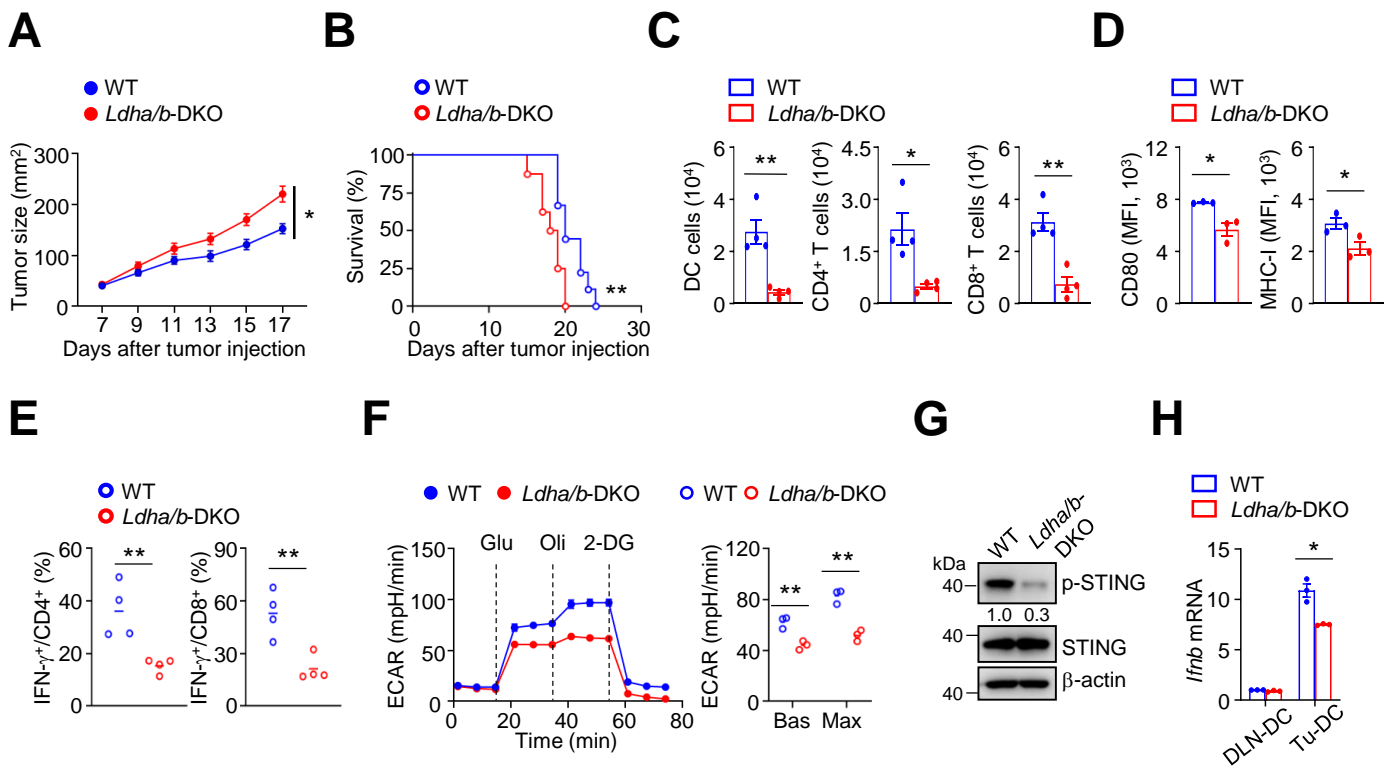

**Supplementary Figure 3. Blockade of glycolysis inhibits DC antitumor function.** (A and B) Tumor growth (A) and survival curves (B) of WT (n = 9) and *Ldha/b*-DKO mice (n = 8) inoculated subcutaneously (s.c.) with B16-F10 tumor cells. (C) The numbers of tumor-infiltrating DCs, CD8<sup>+</sup> and CD4<sup>+</sup> T cells of B16 tumor-bearing WT and *Ldha/b*-DKO mice at day 14 after tumor inoculation (n = 4). (D) Flow cytometry analysis of CD80 and MHC-I expression in the tumor-infiltrating DCs from B16 tumor-bearing WT and *Ldha/b*-DKO mice at day 14 after tumor inoculation (n = 3). (E) Flow cytometry analysis of IFN- $\gamma$ -producing tumor-infiltrating CD8<sup>+</sup> and CD4<sup>+</sup> T cells from WT and *Ldha/b*-DKO mice inoculated s.c. with B16-F10 tumor cells at day 14 (n = 4). (F) ECAR of freshly isolated tumor-infiltrating DCs from WT and *Ldha/b*-DKO mice inoculated s.c. with B16-F10 cells at day 14 (n = 3) under Bas or Max conditions. (G) Immunoblot analysis of indicated proteins in whole-cell lysates of freshly isolated tumor-infiltrating DCs from WT and *Ldha/b*-DKO mice inoculated s.c. with B16-F10 cells at day 14. The numbers indicate the relative densities of indicated protein bands normalized to  $\beta$ -actin. (H) qRT-PCR analysis of freshly isolated tumor-infiltrating DCs from WT and *Ldha/b*-DKO mice inoculated s.c. with B16-F10 cells at day 14. Data are representative of three independent experiments. Data are presented as mean  $\pm$  SEM. (A) was analyzed by using two-way ANOVA statistical analyses. (B) was analyzed by log-rank (Mantel-Cox) test. Statistical analysis (C-F, H) was performed using two-tailed Student's t test: \*p < 0.05; \*\*p < 0.01.

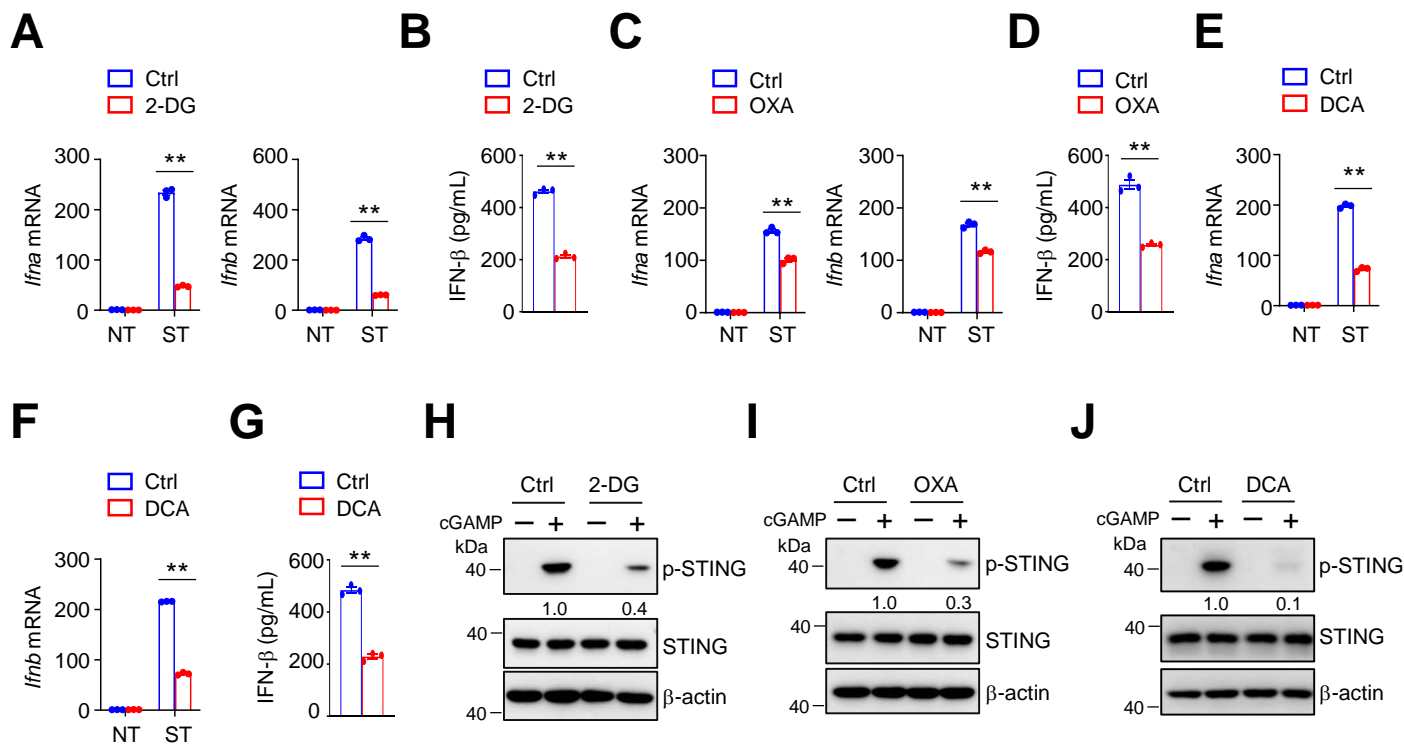

**Supplementary Figure 4. Glycolysis inhibition impairs STING signaling pathway.** BMDCs were treated with 2-DG (A, B and H; 1mM), Oxa (C, D and I; 20mM) and DCA (E, F, G and J; 10mM) overnight and subsequently stimulated with 2 $\mu$ g/mL cGAMP. (A, C, E and F) qRT-PCR analysis of indicated genes in BMDCs stimulated with cGAMP for 3 h. (B, D and G) ELISA analysis of IFN- $\beta$  protein level in BMDCs stimulated with cGAMP for 8 h. (H, I and J) Immunoblot analysis of indicated proteins in whole-cell lysates of BMDCs stimulated with cGAMP for 4 h. NT, non-treated. ST, cGAMP treated. The numbers indicate the relative densities of indicated protein bands normalized to  $\beta$ -actin. Data are representative of three independent experiments. Data are presented as mean  $\pm$  SEM. Statistical analysis was performed using two-tailed Student's t test: \*\* $p < 0.01$ .

**A**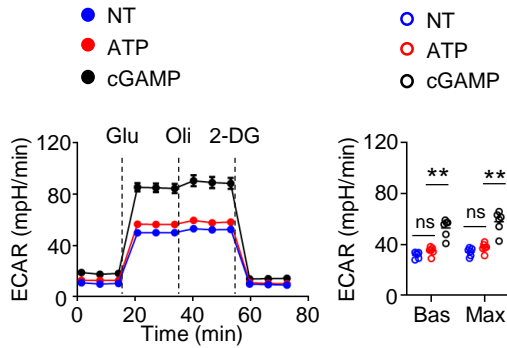**B**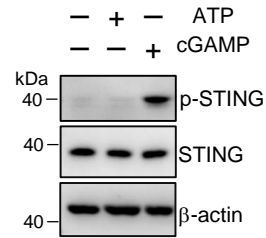**C**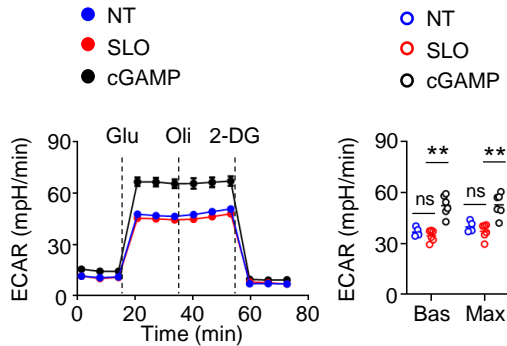**D**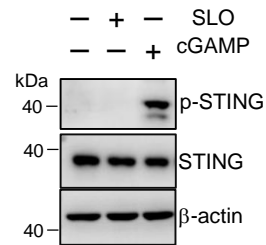

**Supplementary Figure 5. Treatment with ATP or SLO alone does not promote glycolysis and STING activation in DCs.** (A) ECAR under Bas or Max conditions of BMDCs treated with ATP or 2 $\mu$ g/mL cGAMP for 2 h. NT, non-treated. (B) Immunoblot analysis of indicated proteins in whole-cell lysates of BMDCs treated with ATP or 2 $\mu$ g/mL cGAMP for 4 h. (C) ECAR under Bas or Max conditions of BMDCs treated with SLO or 2 $\mu$ g/mL cGAMP for 2 h. NT, non-treated. (D) Immunoblot analysis of indicated proteins in whole-cell lysates of BMDCs treated with SLO or 2 $\mu$ g/mL cGAMP for 4 h. Data are representative of three independent experiments. Data are presented as mean  $\pm$  SEM. Statistical analysis was performed using one-way ANOVA statistical analyses; ns, not statistically significant; \*\* $p < 0.01$ .

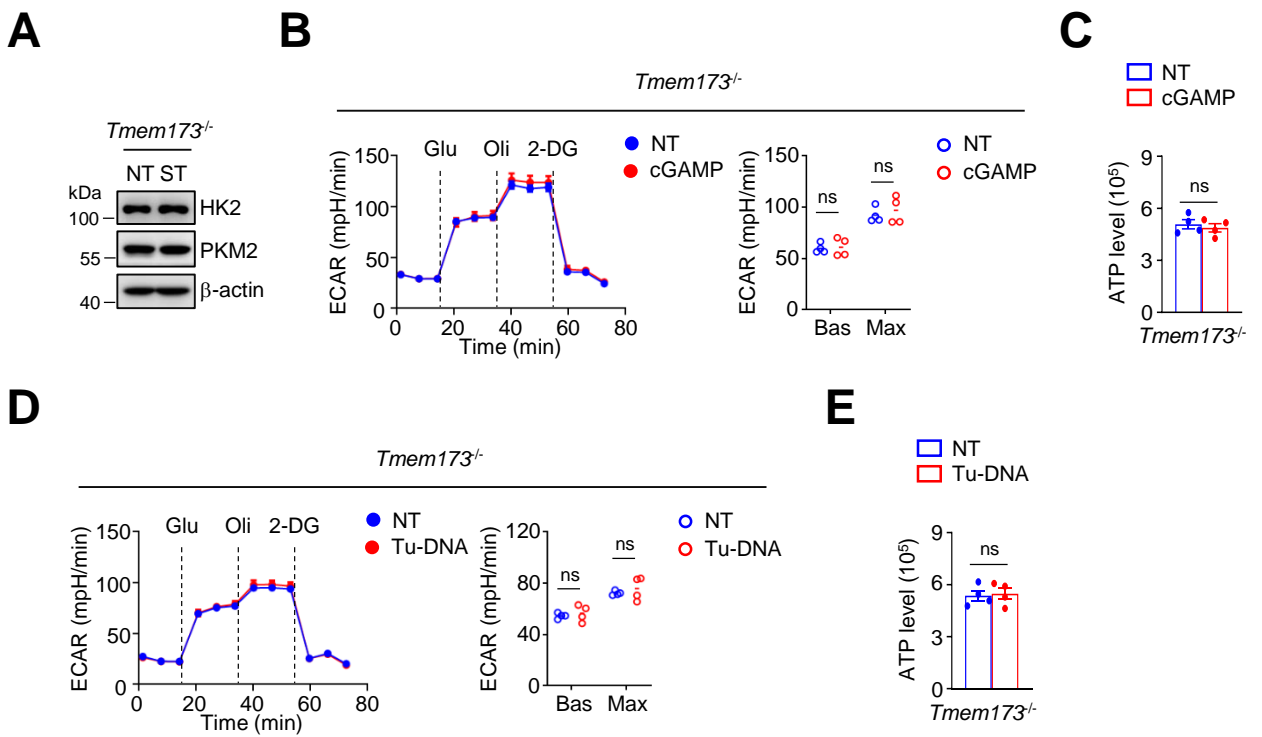

**Supplementary Figure 6. STING signaling is required for cGAMP- and tumor DNA-induced glycolysis.** (A) Immunoblot analysis of indicated proteins in whole-cell lysates of *Tmem173<sup>-/-</sup>* BMDCs stimulated with 2 $\mu$ g/mL cGAMP for 4 h. NT, non-treated. ST, cGAMP stimulated. (B and D) ECAR of *Tmem173<sup>-/-</sup>* BMDCs stimulated with 2 $\mu$ g/mL cGAMP (B) or 40 $\mu$ g/mL Tu-DNA (D) for 4 h. (C and E) Intracellular ATP of *Tmem173<sup>-/-</sup>* BMDCs stimulated with 2 $\mu$ g/mL cGAMP (C) or 40 $\mu$ g/mL Tu-DNA (E) for 4 h. Data are representative of three independent experiments. Data are presented as mean  $\pm$  SEM. Statistical analysis was performed using two-tailed Student's t test: ns, not statistically significant.

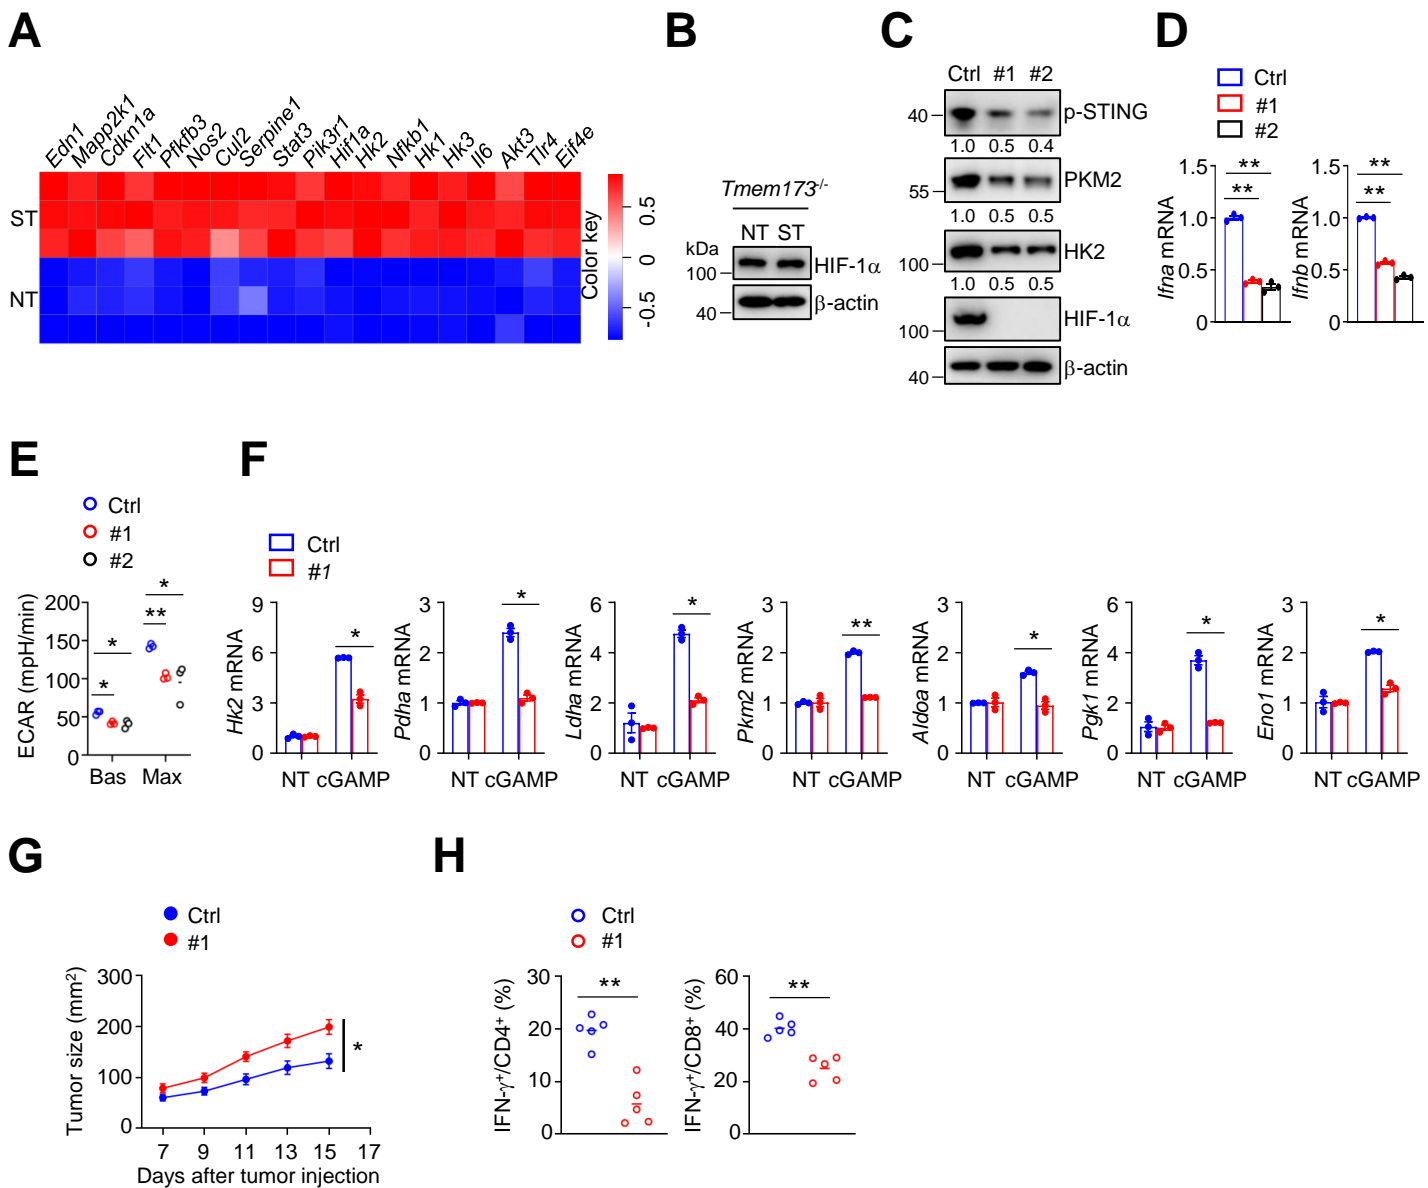

**Supplementary Figure 7. DC-intrinsic STING activation accelerates HIF-1 $\alpha$  signaling.** (A) Heatmap analysis for HIF-1 signaling-related genes in WT BMDCs stimulated with 2 $\mu$ g/mL cGAMP for 4 h. (B) Immunoblot analysis of indicated proteins in whole-cell lysates of *Tmem173*<sup>-/-</sup> BMDCs stimulated with 2 $\mu$ g/mL cGAMP for 4 h. NT, non-treated. ST, cGAMP stimulated. (C-E) Immunoblot analysis (C), qRT-PCR analysis (D) and ECAR (E) of WT and CRISPR/Cas9-mediated *Hif1a*-knockout DC2.4 cells stimulated with 2 $\mu$ g/mL cGAMP for 4 h. Ctrl, WT DC2.4 cells; #1 and #2, *Hif1a*-knockout DC2.4 cells. (F) qRT-PCR analysis of glycolysis related genes in WT and CRISPR/Cas9-mediated *Hif1a*-knockout DC2.4 cells stimulated with 2 $\mu$ g/mL cGAMP for 4 h. Ctrl, WT DC2.4 cells; #1, *Hif1a*-knockout DC2.4 cells. (G) Tumor growth of MC38 tumor-bearing WT mice transferred with cGAMP-stimulated DCs. The WT (Ctrl) and *Hif1a*-knockdown BMDCs (#1) were stimulated with 2 $\mu$ g/mL cGAMP for 4 h. MC38 tumor-bearing WT mice were injected s.c. adjacent to the tumor with 2 $\times 10^6$  cGAMP-stimulated DCs at day 3 after tumor cell inoculation (n = 10). (H) Flow cytometry analysis of IFN- $\gamma$ -producing tumor-infiltrating CD8<sup>+</sup> and CD4<sup>+</sup> T cells from the tumor-bearing mice (G) (n = 5). The numbers indicate the relative densities of indicated protein bands normalized to  $\beta$ -actin. Data are representative of three independent experiments. Data are presented as mean  $\pm$  SEM. (F, H) were performed using two-tailed Student's t test. (D, E) were analyzed by using one-way ANOVA statistical analyses. (G) was analyzed by using two-way ANOVA statistical analyses. \*p < 0.05; \*\*p < 0.01.
